### SP2.2.1

#### Improving surgical training: core programme performance related to rotation theme, design, and trainee protocol engagement

Katie Mellor<sup>1</sup>, David B Robinson<sup>1</sup>, Osian P James<sup>1</sup>, Arfon GMT Powell<sup>1,2</sup>, Richard J Egan<sup>3,4</sup>, Wyn G Lewis<sup>1</sup>

<sup>1</sup>Health Education and Improvement Wales' School of Surgery, Tŷ Dysgu, Cefn Coed, Nantgarw, UK, CF15 7QQ, <sup>2</sup>Division of Cancer & Genetics, Cardiff University, UK, CF14 4XW, <sup>3</sup>Department of Surgery, Morriston Hospital, Swansea, UK, SA6 6NL, <sup>4</sup>Swansea University, Singleton Park, Swansea, UK, SA2 8PP

**Aims:** Core Surgical Training (CST) and Improving ST (IST) programmes are in flux and their design controversial. This study aimed to evaluate the relative performance of a single Statutory Education Board's (SEB) CST and IST programmes related to rotation design, theme, and protocol engagement.

**Methods:** Individual rotations numbering 181 were analysed prospectively over six-years (2014 to 2020). Primary outcome measures were MRCS pass and specialty National Training Number (NTN) appointment.

**Results:** Overall MRCS pass was 68.5% and NTN appointment 39.2%. NTN appointment related to rotation design varied from zero to 100% (median 40.0%). Conversion to NTN varied by specialty theme and ranged from: General surgery CST 35.6% to General surgery (IST pilot) 87.5% ( $p=0.004$ ). Multivariable analysis revealed NTN appointment was associated with: operative logbook caseload  $>464$  (OR 3.02,  $p=0.068$ ), scientific article publication (OR 4.82,  $p=0.006$ ), and universal ARCP Outcome 1 (OR 37.83,  $p<0.001$ ), and IST (OR 55.54,  $p=0.006$ ).

**Conclusions:** Focused rotational design allied to enhanced performance management, and protocol engagement, were associated with improved conversion to higher surgical specialty training.
